# Supplementary material for: Clinical efficacy of spray‐based heat‐treated lactobacilli in canine atopic dermatitis: a preliminary, open‐label, uncontrolled study
Source: PubMed Central journal article supplement — Vet Dermatol. 2020 Nov 27;32(2):114–e23. doi: 10.1111/vde.12915 (PMC8048791; doi:10.1111/vde.12915), 2020-11-27

## Supporting Information

Figure S1 Median values for total and regional CADESI-04 scores and PVAS scores.

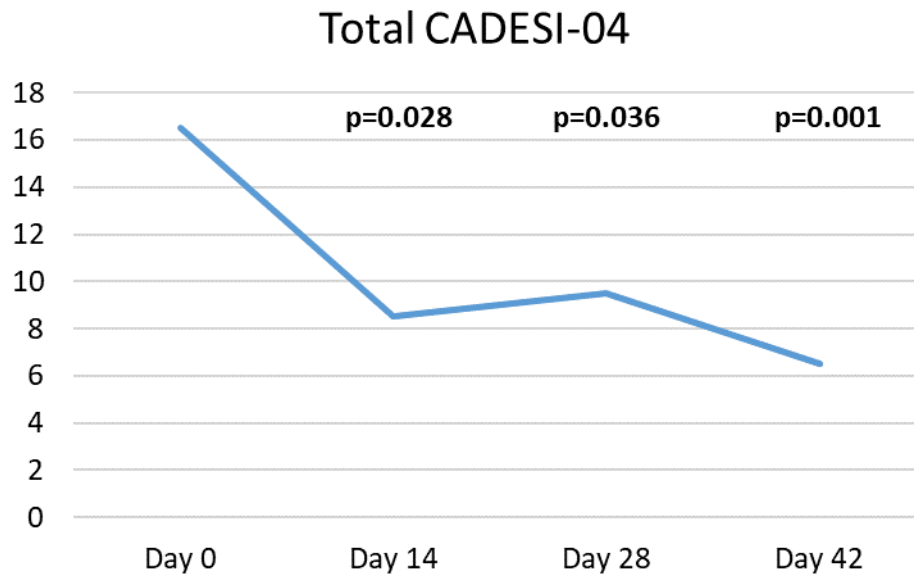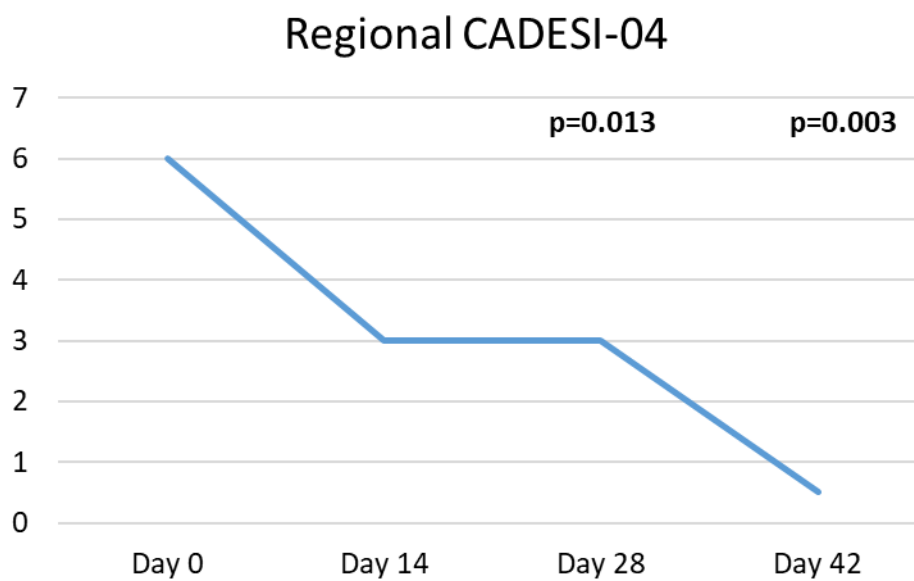

Groups were compared using Friedman's followed by Dunn's multiple comparison tests.

CADESI Canine Atopic Dermatitis Extend and Severity Index

PVAS Pruritus Visual Analog Scale

Figure S2 Median values for Pruritus Visual Analog Scale

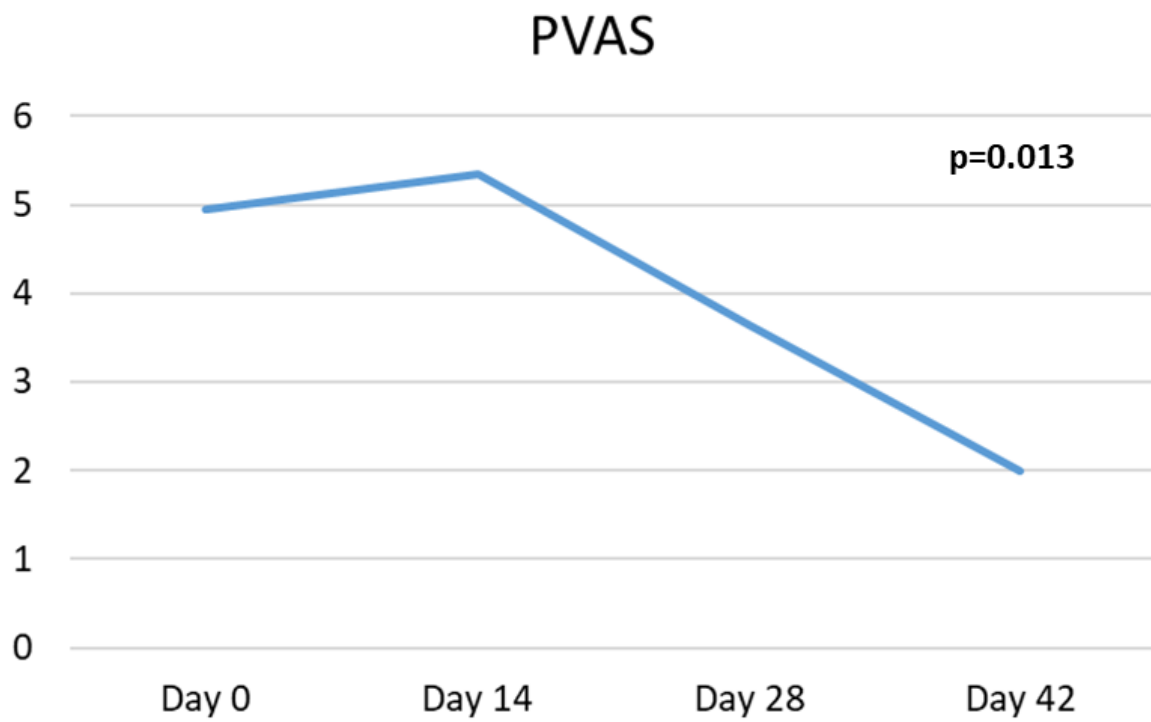

Groups were compared using Friedman's followed by Dunn's multiple comparison tests.

PVAS Pruritus Visual Analog Scale.

Figure S3 OGATE and ease of administration of the Lactobacilli-based spray for 10 atopic dogs (and owners).

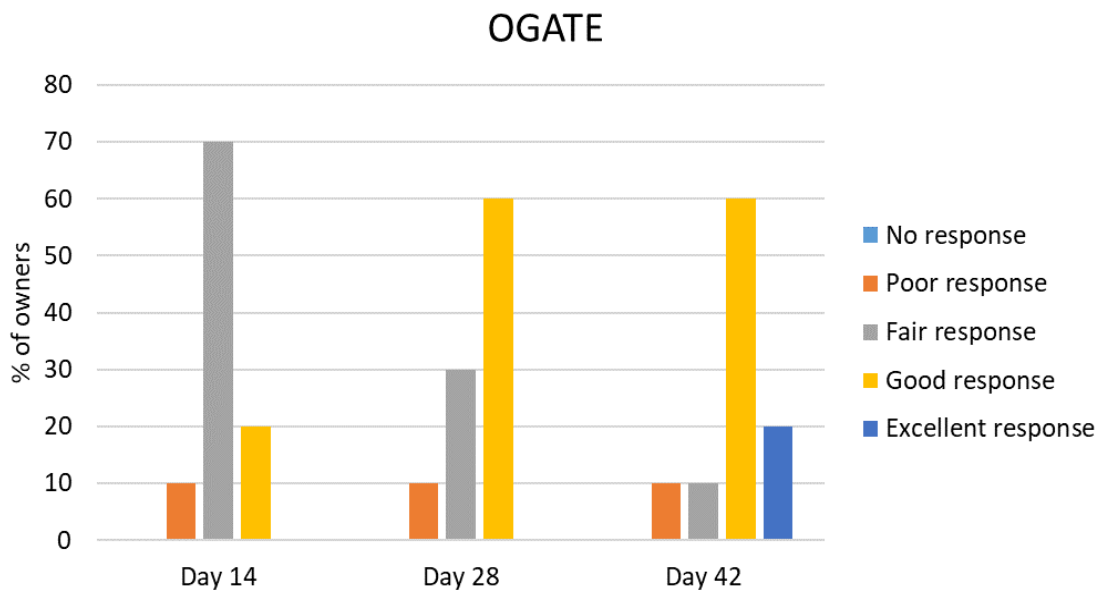

OGATE: owner global assessment of treatment efficacy.

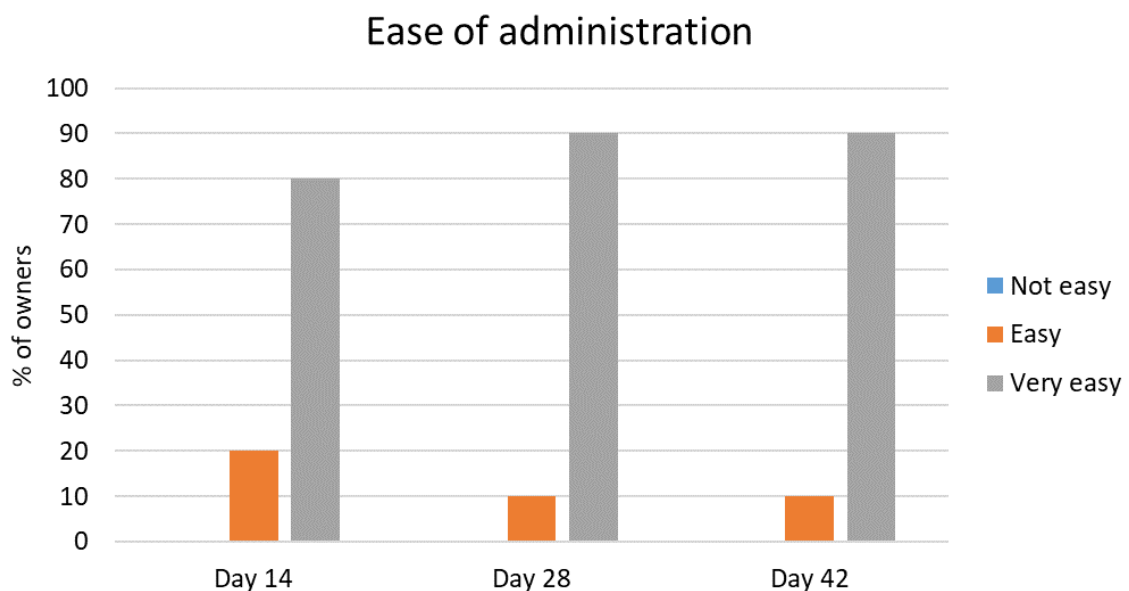

The graphs show the percentages of owner participating in the study.

Figure S4 The distribution of the top 20 operational taxonomic units at genus level in the axillae samples from 10 dogs

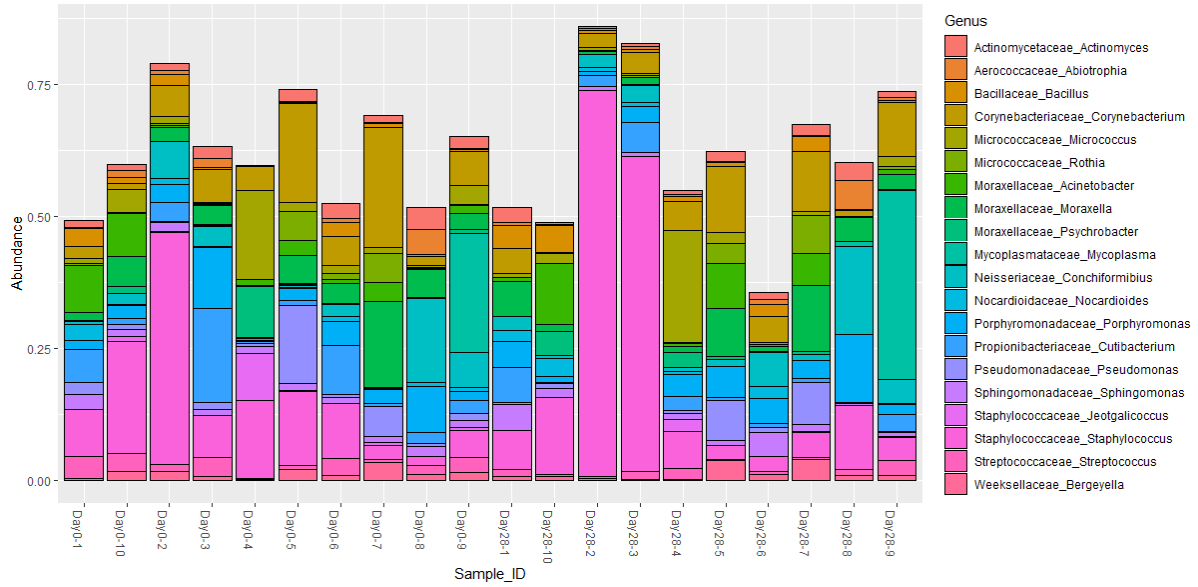

Figure S5 Principal coordinates analysis at genus level in the axillae samples based on Bray-Curtis dissimilarity matrices

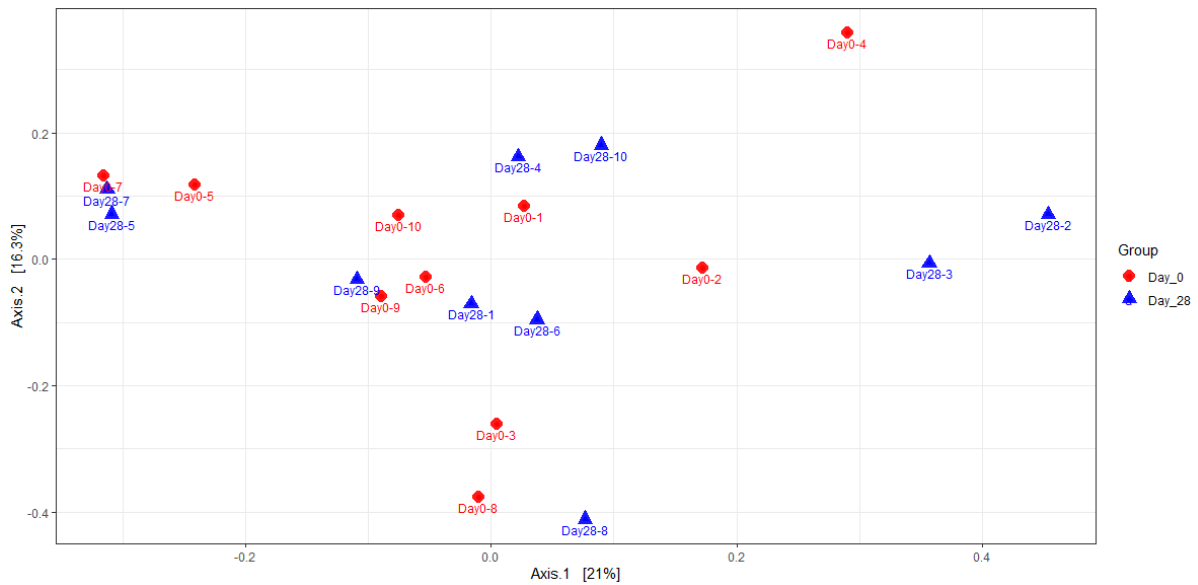

Figure S6 The distribution of the top 20 operational taxonomic units at family level in the axillae samples

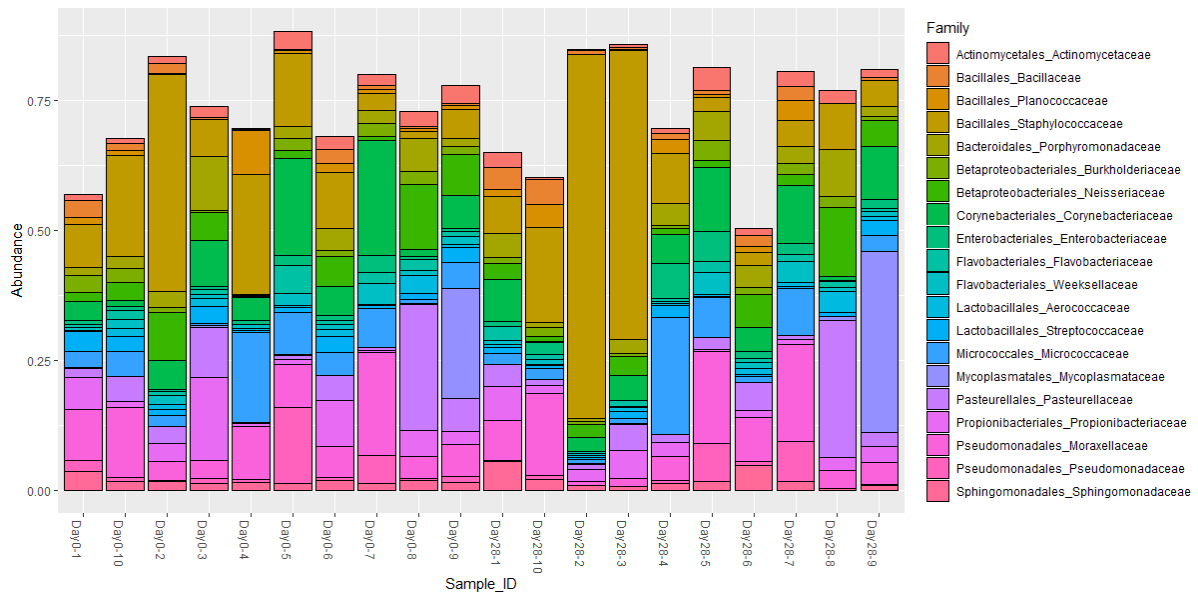

Figure S7 Principal coordinates analysis at family level in the axillae samples based on Bray-Curtis dissimilarity matrices

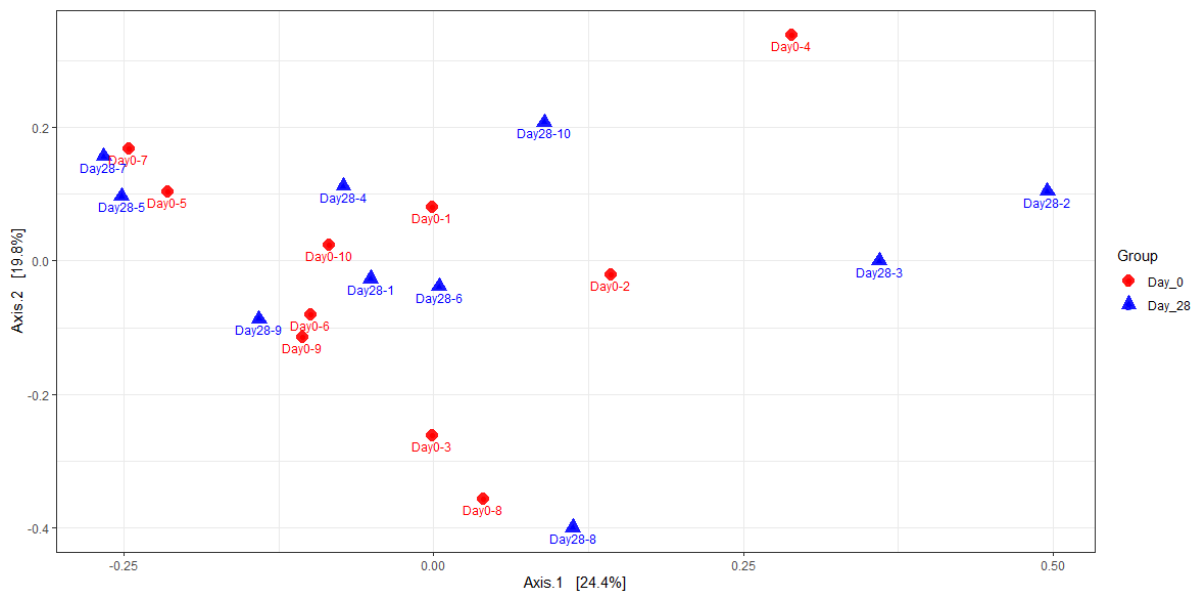

Figure S8 The distribution of the top 20 operational taxonomic units at genus level in the inguinal samples

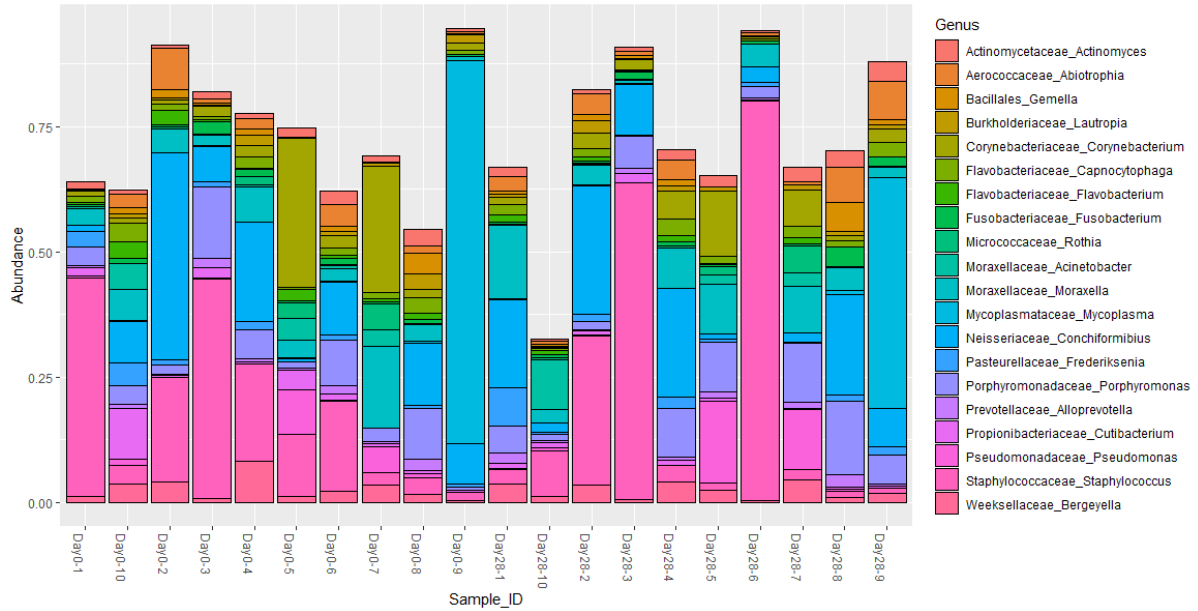

Figure S9 Principal coordinates analysis at genus level in the inguinal samples based on Bray-Curtis dissimilarity matrices

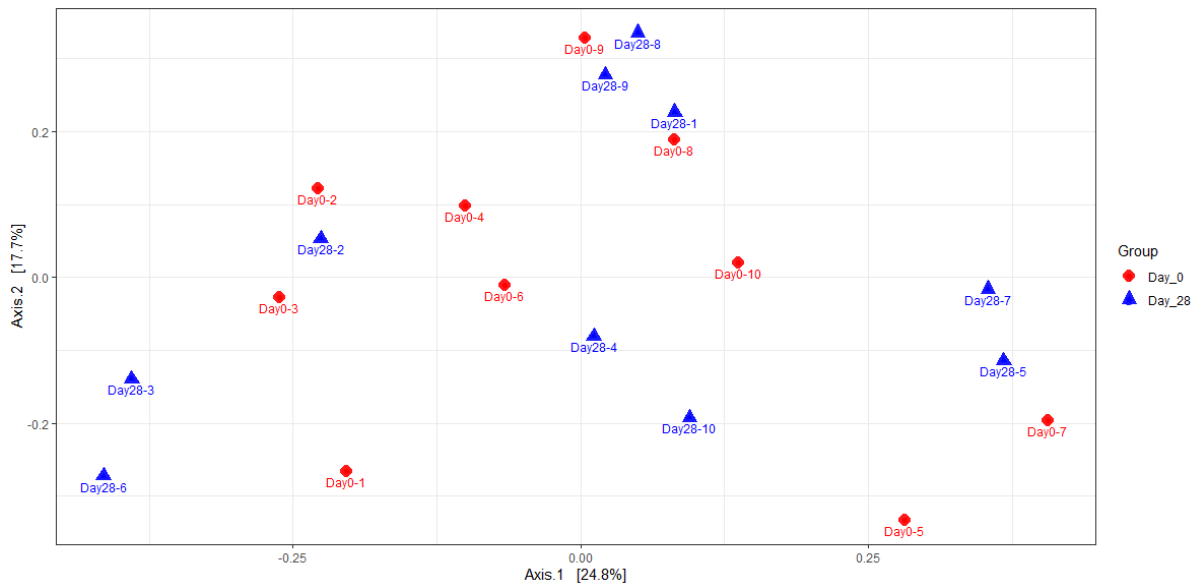

Figure S10 The distribution of the top 20 operational taxonomic units at family level in the inguinal samples  $\mu$

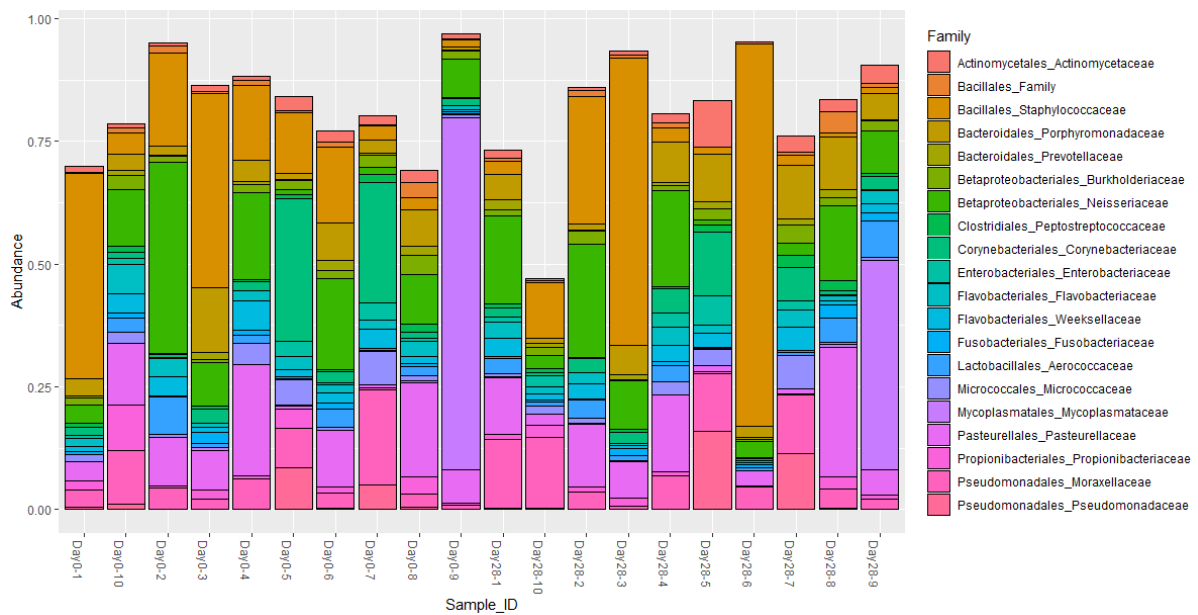

Figure S11 Principal coordinates analysis at family level in the inguinal samples based on Bray-Curtis dissimilarity matrices

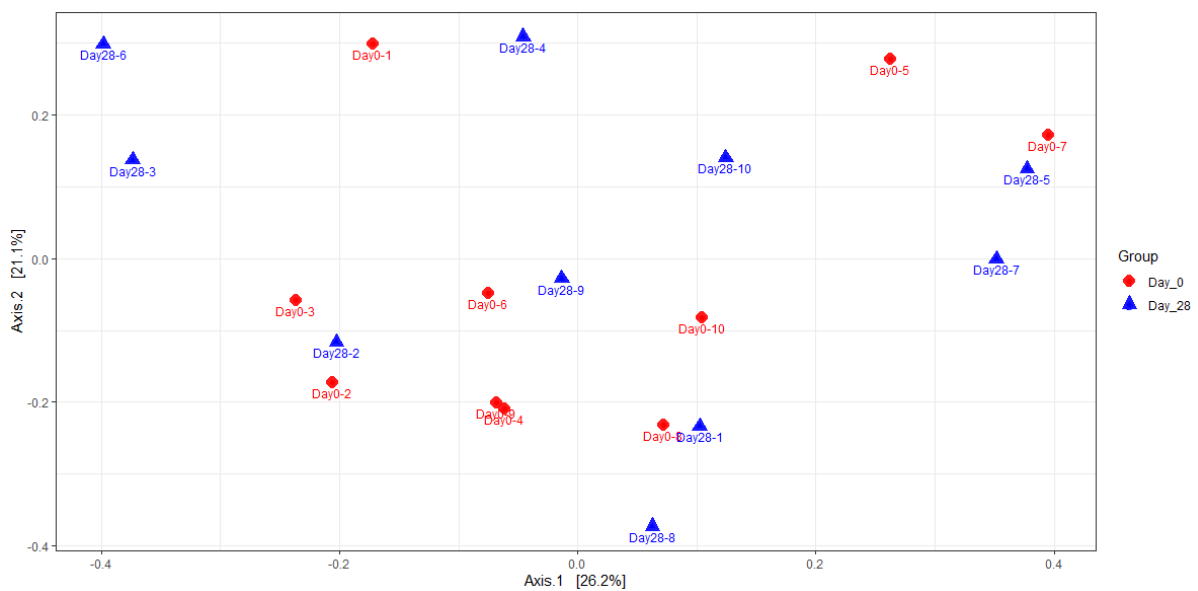

Supplement: VDE-32-114-s001.pdf [file VDE-32-114-s001.pdf]
